# Supplementary material
Source: PubMed Central journal article supplement (PMC3033752)
Supplement: NIHMS234396-supplement-01.pdf [file NIHMS234396-supplement-01.pdf]

## Supplementary Material

### A Histone Deacetylase-Dependent Screen in Yeast

Sujith V. W. Weerasinghe, Magdalene Wambua, and Mary Kay H. Pflum\*

**Table S1. Deacetylase activity of immunoprecipitated Rpd3-LexA-FLAG fusions\***

| Column | Sample                | Trial1 | Trial2 | Trial3 | Mean | S.E |
|--------|-----------------------|--------|--------|--------|------|-----|
| 1      | No protein            | 17     | 4      | 31     | 17   | 8   |
| 2      | Rpd3                  | 100    | 100    | 100    | 100  | -   |
| 3      | Rpd3+TSA              | 7      | 16     | 7      | 10   | 3   |
| 4      | Rpd3H150/151A         | 18     | 16     | 9      | 14   | 3   |
| 5      | Rpd3H150/151A<br>+TSA | 18     | 14     | 13     | 15   | 2   |

\*percentage activity compared to wild type (WT) Rpd3-LexA-FLAG (100%) observed with three independent trials is shown with standard error (S.E). Data is shown as a histogram in Figure 3 of the manuscript.

**Table S2. Data from the quantitative ONPG screen\***

| Column # | Sample contents     | Trial 1 | Trial 2 | Trial 3 | Trial 4 | Trial 5 | Mean | S.E |
|----------|---------------------|---------|---------|---------|---------|---------|------|-----|
| 1        | LACZ reporter alone | 3.5     | 2.9     | 3.4     | 6.5     | 5.9     | 4.4  | 0.7 |
| 2        | LACZ reporter + TSA | 2.9     | 2.8     | 4.6     | 4.8     | 6.2     | 4.3  | 0.7 |
| 3        | WT Rpd3             | 1.0     | 1.0     | 1.0     | 1.0     | 1.0     | 1.0  | -   |
| 4        | WT Rpd3 + TSA       | 1.4     | 1.5     | 2.2     | 1.6     | 1.4     | 1.6  | 0.1 |
| 5        | Rpd3 mutant         | 2.3     | 2.0     | 2.9     | 3.3     | 4.2     | 3.0  | 0.4 |
| 6        | Rpd3 mutant + TSA   | 2.2     | 2.5     | 3.2     | 4.8     | 5.2     | 3.6  | 0.6 |

\*mean fold change compared to wild type (WT) Rpd3-LexA-FLAG (1.00- column 3) observed with three independent trials is shown with standard error (S.E). Data is shown as a histogram in Figure 4 of the manuscript.

**Table S3. Dose dependent inhibition of Rpd3-LexA-FLAG by TSA\***

| Column # | TSA         | Trial 1 | Trial 2 | Trial 3 | Trial 4 | Trial 5 | Mean | S.E  |
|----------|-------------|---------|---------|---------|---------|---------|------|------|
| 1        | 0 $\mu$ M   | 1.0     | 1.0     | 1.0     | 1.0     | ND      | 1.0  | -    |
| 2        | 1 $\mu$ M   | 1.2     | 1.2     | 1.2     | 1.3     | ND      | 1.2  | 0.03 |
| 3        | 10 $\mu$ M  | 1.1     | 1.6     | 1.7     | 1.6     | ND      | 1.5  | 0.1  |
| 4        | 18 $\mu$ M  | 1.8     | 1.4     | 1.5     | 1.8     | ND      | 1.6  | 0.1  |
| 5        | 100 $\mu$ M | 1.4     | 1.5     | 2.2     | 1.4     | 1.6     | 1.6  | 0.1  |

\*mean fold change compared to wild type Rpd3-LexA-FLAG in the absence of TSA (1.00- column 1) observed with at least four independent trials is shown with standard error (S.E). ND = Not determined. Data is shown as a histogram in Figure 5 of the manuscript.

**Table S4. TSA sensitivity of Rpd3-LexA-FLAG as a function of zymolyase concentration**

| Column # | Zymolyase U /mL | Trial 1 | Trial 2 | Trial 3 | Trial 4 | Trial 5 | Mean | S.E  |
|----------|-----------------|---------|---------|---------|---------|---------|------|------|
| 1        | 0               | 1.5     | 1.7     | 2.0     | 1.7     | ND      | 1.7  | 0.1  |
| 2        | 1               | 1.8     | 2.0     | 1.7     | ND      | ND      | 1.8  | 0.09 |
| 3        | 13              | 2.2     | 2.2     | 3.3     | ND      | ND      | 2.6  | 0.4  |
| 4        | 20              | 2.2     | 3.5     | 3.7     | 2.1     | 2.1     | 2.7  | 0.4  |
| 5        | 50              | 3.6     | 3.2     | 3.8     | ND      | ND      | 3.5  | 0.2  |

\*mean fold change compared to wild type Rpd3-LexA-FLAG in the absence of TSA (1.00- data not shown) observed with at least three independent trials is shown with standard error (S.E). ND = Not determined. Data is shown as a histogram in Figure 6 of the manuscript.

**Table S5 Data from the quantitative ONPG screen in the presence of zymolyase\***

| Column # | Sample              | Trial 1 | Trial 2 | Trial 3 | Trial 4 | Trial 5 | Mean | S.E |
|----------|---------------------|---------|---------|---------|---------|---------|------|-----|
| 1        | LacZ reporter       | 5.6     | 5.4     | 6.4     | ND      | ND      | 5.8  | 0.3 |
| 2        | LacZ reporter + TSA | 4.7     | 6.0     | 5.8     | ND      | ND      | 5.5  | 0.4 |
| 3        | WT Rpd3             | 1.0     | 1.0     | 1.0     | ND      | ND      | 1.0  | -   |
| 4        | WT Rpd3 + TSA       | 2.2     | 3.5     | 3.7     | 2.1     | 2.1     | 2.7  | 0.4 |
| 5        | Rpd3 mutant         | 4.5     | 4.9     | 3.7     | 3.2     | ND      | 4.1  | 0.4 |
| 6        | Rpd3 mutant + TSA   | 4.4     | 4.2     | 4.2     | 4.7     | ND      | 4.4  | 0.1 |

\*mean fold change compared to wild type (WT) Rpd3-LexA-FLAG in the absence of TSA (1.00- column 3) observed with at least three independent trials is shown with standard error (S.E). ND = Not determined. Data is shown as a histogram in Figure 7 of the manuscript.

**Table S6 Data from the screen with Apicidin and SAHA\***

| Column # | Sample               | Trial 1 | Trial 2 | Trial 3 | Trial 4 | Mean | S.E  |
|----------|----------------------|---------|---------|---------|---------|------|------|
| 1        | zymolyase            | 1.0     | 1.0     | 1.0     | 1.0     | 1.0  | -    |
| 2        | apicidin             | 1.0     | 1.1     | 1.0     | ND      | 1.0  | 0.03 |
| 3        | zymolyase + apicidin | 1.3     | 1.4     | 1.4     | ND      | 1.4  | 0.03 |
| 4        | SAHA                 | 0.92    | 0.88    | 0.91    | ND      | 0.90 | 0.01 |
| 5        | Zymolyase + SAHA     | 1.6     | 1.4     | 1.3     | 1.3     | 1.4  | 0.07 |

\*mean fold change compared to wild type Rpd3-LexA-FLAG in the absence of inhibitor (1.00- column 1) observed with at least three independent trials is shown with standard error (S.E). ND = Not determined. Data is shown as a histogram in Figure 8 of the manuscript.
